## Research Article

# Gene polymorphism associated with angiotensinogen (M235T), endothelial lipase (584C/T) and susceptibility to coronary artery disease: a meta-analysis

Hongyan Zhao, Ranzun Zhao, Shan Hu and  Jidong Rong

Department of Cardiovascular Medicine, Affiliated Hospital of Zunyi Medical University, Zunyi, Guizhou Province 563003, China

**Correspondence:** Jidong Rong (Rongjidong123@hotmail.com)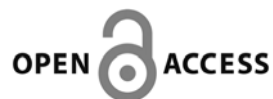

**Objective:** To explore the association between the variant M235T locus of angiotensinogen (AGT) gene, 584C/T locus of Endothelial lipase (EL) gene, and coronary artery disease (CAD) by meta-analysis.

**Methods:** The case-control studies on the association between AGT/EL gene polymorphism and CAD were collected through searching PubMed, Excerpta Medica Database (EMBASE), Web of Science, China National Knowledge Infrastructure (CNKI), and Wanfang databases up to 1 March 2020. Stata 15.0 software was used for analysis.

**Results:** A total of 29 articles met the inclusion criteria. After analyzing, it was found that the M235T polymorphism of AGT gene was associated with the occurrence of CAD. In the allele model (T vs. M), OR = 1.38 ( $P < 0.05$ ). In other heredity, there was also statistical significance. Subgroup analysis indicated that except the heterozygous genetic model of the Chinese population, other genetic models of the Caucasian and Chinese population were also statistically significant. The 584C/T polymorphism of EL gene was associated with the occurrence of CAD, with OR = 0.83 ( $P < 0.05$ ) in the allele model (T vs. C) and OR = 0.80 ( $P < 0.05$ ) in the dominant gene model. Also, in the allele model of Caucasian subgroup, OR = 0.83 ( $P < 0.05$ ), while in Asian subgroup, there was no statistically significant genetic model.

**Conclusion:** AGT M235T and EL 584C/T polymorphisms are associated with CAD susceptibility. The genotype TT, TC or allele T of AGT M235T and genotype CC or allele C of EL 584C/T might be the genetic risk factors for the development of CAD.

## Introduction

Coronary artery disease (CAD), the incidence of which is increasing year by year in both developed and developing countries, is the leading cause of deaths and seriously endangers human health [1,2]. With the increase in age, the incidence of CAD increases gradually [3]. Common risk factors, such as dyslipidemia, hypertension and diabetes, are affected by both environmental and genetic factors [4]. Also, these traditional risk factors could not directly lead to CAD, and there might be other factors directly leading to atheromatous plaques formation that are related to genetic susceptibility. Moreover, increasing studies have demonstrated that the renin-angiotensin system (RAS) plays a vital role in CAD [5].

Renin is mainly secreted by renal juxtaglomerular cells, and it can catalyze the conversion of plasma pro-angiotensin (AGT) into Angiotensin I. Also, Angiotensin I can be further converted into angiotensin II, III, IV, to play the role of vasoconstriction. It has been found that AGT M235T polymorphism is closely related to the occurrence of cardiovascular disease. M235T refers to the substitution of nucleotide T at

Received: 27 April 2020  
Revised: 08 July 2020  
Accepted: 13 July 2020

Accepted Manuscript online:  
15 July 2020  
Version of Record published:  
24 July 2020

location 704 of the second exon by C, resulting in the conversion of amino acid at position 235 from methionine (M) into threonine (T). Some studies have confirmed that Angiotensinogen (AGT) M235T polymorphism is closely related to the severity of CAD [6]. Van et al. [7] have suggested that the haplotype of AGT gene is associated with coronary heart disease in familial hypercholesterolemia. While, AGT M235T polymorphism is not associated with CAD in diabetic patients [8]. Khatami et al. [9] suggested that allele T of the AGT gene would increase the risk of CAD, while Zhu et al. [10] indicated that allele T would not increase the risk of CAD.

Related studies have shown that low plasma high-density lipoprotein cholesterol (HDL-C) concentration is closely related to the incidence of coronary heart disease (CAD). In contrast, high HDL-C levels can reduce the risk of CAD [11]. The concentration of HDL-C in plasma is not only affected by environmental factors, but also highly hereditary. Current genetic studies indicate that the genetic heterogeneity of HDL-C is associated with the gene polymorphism of endothelial lipase (LIPG), which could regulate the metabolism of HDL [12]. Endothelial lipase (EL), a member of the triglyceride lipase family, has high homology with Lipoprotein lipase (LPL) and Hepatic lipase (HL), and plays a critical role in the regulation of lipid metabolism, especially in the process of HDL-C metabolism. The main activity of EL is phospholipase activity, and HDL granules are its preferred substrate. Plasma EL activity affects human high-density lipoprotein metabolism and coronary artery risk factors [13]. The relationship between EL 584C/T polymorphism and CAD susceptibility has been discussed, but there is not consistent conclusion. Solim et al. [14] believed that allele T of EL gene was a protective factor of CAD, but Xie et al. [15] did not find this association in the Chinese population.

Furthermore, to compare different research results more scientifically and objectively, meta-analysis is used to conduct a comprehensive study on this issue. On this basis, a meta-analysis of the genotypic data from all eligible surveys in recent years was administered to more accurately evaluate the relationship between AGT (M235T), Endothelial (584C/T) polymorphism and susceptibility to CAD, thus providing evidence-based medicine for cardiovascular clinic.

## Methods

### Literature search

A combination of following terms: Angiotensinogen, Endothelial lipase, myocardial infarction, coronary artery disease, acute myocardial infarction, cardiovascular disease, ischemic heart disease, coronary heart disease, acute coronary syndrome and polymorphism. We systematically searched the relevant literatures of relationship between Angiotensinogen, Endothelial lipase Polymorphism and Coronary artery Disease on PubMed, Excerpta Medica Database (EMBASE), Web of Science, China National Knowledge Infrastructure (CNKI) and China Wanfang databases up to 1 March 2020. The retrieval strategy was as follows: (myocardial infarction OR coronary artery disease OR acute myocardial infarction OR cardiovascular disease OR ischemic heart disease OR coronary heart disease OR acute coronary syndrome) AND (Angiotensinogen OR Endothelial lipase) AND (polymorphism OR Single nucleotide mutation). There were no language restrictions.

### Inclusion and exclusion criteria

#### Inclusion criteria

(1) It was case-control study; (2) CAD was defined as coronary heart disease, coronary artery disease, myocardial infarction, acute Myocardial infarction, acute coronary syndrome, cardiovascular disease; (3) the number of genotypes should be provided in both the case group and the control group.

#### Exclusion criteria

(1) No specific amount of genotypes was provided, or the data of each genotype cannot be obtained by calculation, (2) repeated studies of the same ethnic group, (3) Newcastle-Ottawa Scale (NOS) score was less than 6.

### Data extraction and methodological quality

According to the NOS [16], the full text was carefully read and evaluated. The literature below 6 stars was of low quality, and the research above 6 stars was of high quality, among which only the research above 6 stars was included. The evaluation was conducted independently by two evaluators according to the uniform quality standard, and they extracted the data from the literature and then cross-checked it. When they encountered some differences, they solve these problems through discussion, or with the help of a third party. The extracted data included the number of AGT M235T and EL 584C/T genotypes in the case group and the control group, first author, publication time, source of the control group, and country.

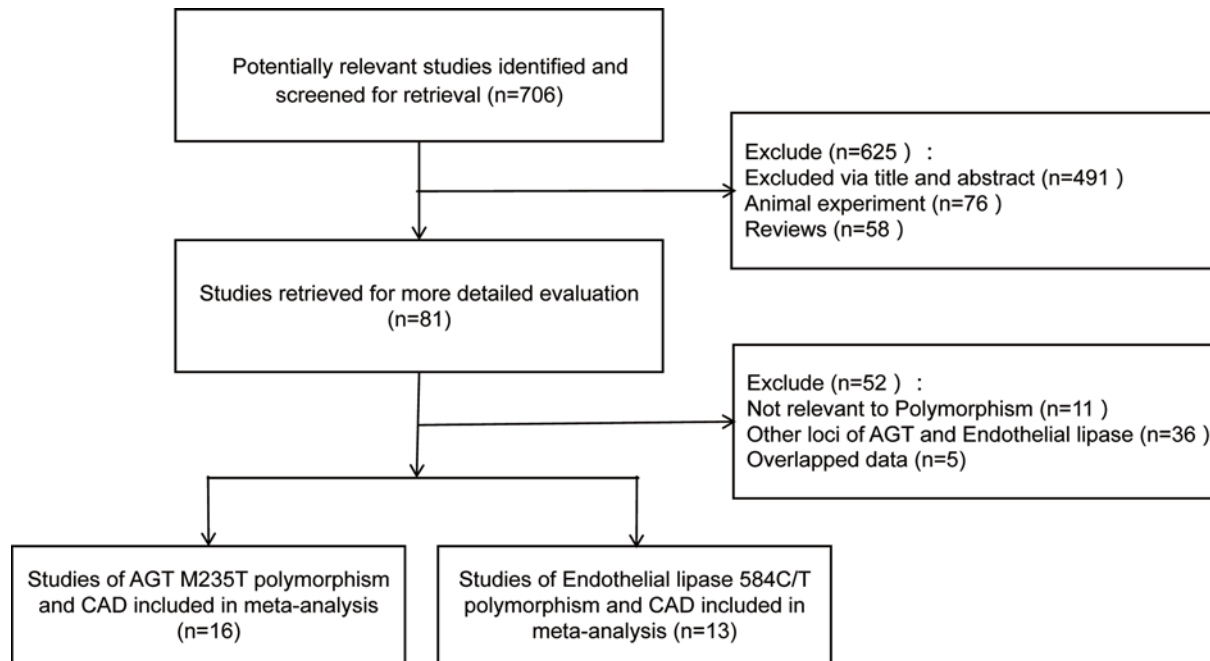

Figure 1. A flow diagram of the study selection process

## Statistical analysis

The odds ratio (OR) and its 95% confidence interval were used to evaluate the association between AGT/EL gene polymorphism and CAD. The data were merged and analyzed by statistical software Stata 15.0. Q test was applied to verify the heterogeneity of the included studies. When  $I^2 \geq 50\%$  or  $P \leq 0.05$ , heterogeneity was considered to exist, the random-effects model (REM) was selected; when  $I^2 < 50\%$  and  $P > 0.05$ , heterogeneity was deemed to be low, and the fixed-effects model (FEM) was used for data integration. Z test was used to test the significance of the combined OR value. The funnel plot was performed to evaluate publication bias, and the criterion was whether the funnel plot was symmetric or not. If the funnel chart was asymmetric, there might be publication bias. Egger's test was also used for checking publication bias. Subgroup analysis was carried out to assess whether Hardy–Weinberg equilibrium (HWE) was satisfied in the ethnicity and control groups. Finally, the sensitivity of the results was analyzed to determine the robustness of the research results.

## Results

### Search results

According to the inclusion and exclusion criteria, 29 articles were collected in this meta-analysis, including 16 studies on the relationship between AGT M235T polymorphism and CAD susceptibility [17–31], and 13 studies on EL 584C/T polymorphism and CAD susceptibility [32–43]. The specific literature screening process was displayed in Figure 1. The characteristics of the study, the distribution frequency of genotypes, and the results of the literature quality score were shown in Tables 1 and 2. The detailed quality assessment included in the study was shown in Supplementary Table S1.

### Meta-analysis results

#### Comparison of alleles

The main results of meta-analysis of AGT M235T polymorphism and CAD susceptibility were shown in Table 3 and Figure 2, while the main findings of meta-analysis of EL 584C/T polymorphism and CAD susceptibility are shown in Table 4 and Figure 3. The comparison of allele T and allele M at M235T locus of AGT gene suggested that there were significant differences in heterogeneity among different studies ( $I^2 = 69.2\%$ ,  $P < 0.05$ ). Therefore, the REM was applied. The results indicated that  $OR = 1.38$  (95% CI: 1.15–1.65), the difference was statistically significant. The same conclusion was obtained from the subgroup analysis of Chinese and Caucasian populations. The allele model

**Table 1** The basic characteristics of AGT M235T polymorphism included in the literature

| First author  | Year | Country              | Age (CAD)     | End point | Source of controls | Cases |     |     | Controls |    |     | HWE (control) | NOS score |
|---------------|------|----------------------|---------------|-----------|--------------------|-------|-----|-----|----------|----|-----|---------------|-----------|
|               |      |                      |               |           |                    | TT    | MT  | MM  | TT       | MT | MM  |               |           |
| Ko            | 1997 | China                | 61.50 ± 5.60  | CAD       | HB                 | 225   | 36  | 6   | 279      | 54 | 4   | 0.454         | 8         |
| Chen          | 1998 | China                | 67.70 ± 8.50  | MI        | PB                 | 40    | 13  | 4   | 32       | 31 | 13  | 0.258         | 8         |
| Sheu          | 1998 | China                | 62.00 ± 1.00  | CAD       | PB                 | 75    | 26  | 1   | 107      | 37 | 1   | 0.247         | 7         |
| Xie           | 2001 | China                | 61.40 ± 9.50  | CAD       | HB                 | 69    | 29  | 8   | 45       | 30 | 11  | 0.109         | 7         |
| Zhu           | 2002 | China                | 58.90 ± 9.20  | CAD       | HB                 | 56    | 48  | 14  | 54       | 42 | 10  | 0.661         | 8         |
| Gu            | 2003 | China                | 65.83 ± 9.23  | CAD       | PB                 | 86    | 31  | 12  | 53       | 30 | 7   | 0.568         | 8         |
| Zhu           | 2004 | China                | 55 (median)   | CAD       | HB                 | 105   | 75  | 12  | 54       | 36 | 8   | 0.355         | 8         |
| Li            | 2004 | China                | 61.60 ± 11.80 | CAD       | PB                 | 49    | 60  | 11  | 25       | 41 | 14  | 0.689         | 7         |
| Ren           | 2005 | China                | 60.40 ± 9.77  | CAD       | HB                 | 67    | 24  | 9   | 31       | 26 | 13  | 0.087         | 7         |
| Yang          | 2013 | China                | 61.47 ± 9.95  | CAD       | HB                 | 73    | 27  | 10  | 34       | 29 | 17  | 0.031         | 7         |
| Huang         | 2013 | China                | 59.30 ± 12.10 | CAD       | HB                 | 104   | 23  | 10  | 54       | 51 | 20  | 0.184         | 7         |
| Al-Hazzani    | 2014 | Caucasian            | 46.61 ± 16.15 | CAD       | HB                 | 73    | 98  | 54  | 31       | 50 | 29  | 0.342         | 8         |
| Bonfim(a)     | 2016 | African-Brazilians   | 55.70 ± 7.90  | CAD       | HB                 | 71    | 104 | 25  | 27       | 28 | 11  | 0.4234        | 8         |
| Bonfim(b)     | 2016 | Caucasian-Brazilians | 55.70 ± 6.70  | CAD       | HB                 | 103   | 146 | 73  | 25       | 67 | 34  | 0.439         | 8         |
| Khatami       | 2017 | Iran                 | 52.60 ± 7.20  | CAD       | HB                 | 15    | 50  | 83  | 10       | 31 | 94  | 0.004         | 8         |
| Isordia-Salas | 2018 | Mexico               | 41.00 ± 5.30  | MI        | PB                 | 6     | 98  | 138 | 10       | 62 | 170 | 0.163         | 8         |
| Zhu           | 2019 | China                | 65.24 ± 10.69 | CAD       | HB                 | 23    | 11  | 3   | 123      | 42 | 5   | 0.545         | 8         |

Abbreviations: HB, hospital-based; MI, myocardial infarction; PB, population-based.

**Table 2** The basic characteristics of EL 584C/T polymorphism included in the literature

| First author | Year | Country     | Age (CAD)    | End point | Source of controls | CAD |     |    | Control |     |     | HWE (control) | NOS score |
|--------------|------|-------------|--------------|-----------|--------------------|-----|-----|----|---------|-----|-----|---------------|-----------|
|              |      |             |              |           |                    | CC  | CT  | TT | CC      | CT  | TT  |               |           |
| Rimm         | 1992 | America     | NR           | CAD       | PB                 | 129 | 117 | 16 | 240     | 239 | 40  | 0.060         | 8         |
| Colditz      | 1997 | America     | NR           | CAD       | PB                 | 115 | 110 | 16 | 224     | 214 | 39  | 0.220         | 8         |
| Tjonneland   | 2007 | Danmark     | 50–64        | CAD       | PB                 | 509 | 406 | 83 | 837     | 673 | 133 | 0.840         | 8         |
| Zhu          | 2007 | China       | 64.74 ± 9.52 | CAD       | PB                 | 186 | 56  | 0  | 150     | 46  | 0   | 0.063         | 7         |
| Shimizu      | 2007 | Japan       | 60.10 ± 0.80 | CAD       | PB                 | 70  | 36  | 1  | 54      | 50  | 3   | 0.030         | 8         |
| Tang         | 2008 | China       | 62.80 ± 0.60 | CAD       | HB                 | 174 | 85  | 6  | 125     | 122 | 18  | 0.100         | 8         |
| Zhang        | 2009 | China       | 54–71        | CAD       | HB                 | 493 | 379 | 69 | 405     | 333 | 56  | 0.264         | 7         |
| Vergeer      | 2010 | Netherlands | 45–79        | CAD       | PB                 | 97  | 413 | 87 | 207     | 857 | 207 | 0.000         | 8         |
| Cai          | 2014 | China       | 51.81 ± 7.76 | CAD       | HB                 | 84  | 45  | 6  | 97      | 64  | 5   | 0.146         | 8         |
| Xie          | 2015 | China       | 59.88 ± 9.20 | CAD       | HB                 | 160 | 116 | 11 | 216     | 139 | 12  | 0.065         | 8         |
| Toosi        | 2015 | Iran        | 64 ± 4.2     | CAD       | HB                 | 67  | 70  | 3  | 28      | 46  | 6   | 0.029         | 8         |
| Elnaggar     | 2018 | Egypt       | 55.90 ± 6.30 | CAD       | HB                 | 58  | 23  | 2  | 17      | 21  | 4   | 0.492         | 8         |
| Solim        | 2018 | Turkish     | 63.04 ± 8.92 | CAD       | HB                 | 40  | 27  | 6  | 26      | 33  | 14  | 0.545         | 8         |

Abbreviations: HB, hospital-based; MI, myocardial infarction; NR, not reported; PB, population-based.

was also statistically significant after the control group was removed from the study that did not meet HWE. The funnel plot (Figure 4A) was symmetrical. Egger's test results showed that  $P > 0.05$ , suggesting no publication bias.

Comparing allele C with allele T at 584C/T locus of EL gene, the heterogeneity between studies was significant ( $I^2 = 69.5\%$ ,  $P < 0.05$ ). Therefore, the REM was used for data merging. The results showed that OR = 0.83 (95% CI: 0.73–0.95), the difference was statistically significant. The analysis of the Caucasian population subgroup and the subgroup without the control group that did not meet HWE showed statistically significant differences. In the Asian population, the allele model was not statistically significant. The funnel plot (see in Figure 5A) was generally symmetrical, and the  $P$ -value of Egger's test was less than 0.05, indicating a particular publication bias.

**Table 3** The results of meta-analysis of AGT M235T polymorphism and CAD susceptibility

| Gene model   | Subgroup      | n  | OR   | 95% CI    | P     | I <sup>2</sup> | P for heterogeneity | Model | P for publication bias (Egger) |
|--------------|---------------|----|------|-----------|-------|----------------|---------------------|-------|--------------------------------|
| T vs. M      | Overall       | 17 | 1.38 | 1.15–1.65 | 0.001 | 69.2           | 0.000               | REM   | 0.459                          |
|              | China         | 12 | 1.42 | 1.08–1.87 | 0.011 | 76.7           | 0.000               | REM   | 0.767                          |
|              | Caucasian     | 4  | 1.37 | 1.16–1.61 | 0.000 | 0.0            | 0.601               | FEM   | 0.532                          |
|              | HWE satisfied | 15 | 1.32 | 1.09–1.60 | 0.005 | 68.9           | 0.000               | REM   | 0.590                          |
| TT+TM vs. MM | Overall       | 17 | 1.51 | 1.28–1.80 | 0.000 | 17.3           | 0.251               | FEM   | 0.764                          |
|              | China         | 12 | 1.53 | 1.15–2.02 | 0.003 | 32.8           | 0.128               | FEM   | 0.205                          |
|              | Caucasian     | 4  | 1.52 | 1.21–1.90 | 0.000 | 0.0            | 0.402               | FEM   | 0.337                          |
|              | HWE satisfied | 15 | 1.43 | 1.19–1.73 | 0.000 | 16.0           | 0.274               | FEM   | 0.670                          |
| TT vs. TM+MM | Overall       | 17 | 1.42 | 1.11–1.83 | 0.006 | 68.1           | 0.000               | REM   | 0.884                          |
|              | China         | 12 | 1.54 | 1.12–2.12 | 0.008 | 73.3           | 0.000               | REM   | 0.458                          |
|              | Caucasian     | 4  | 1.39 | 1.03–1.89 | 0.033 | 32.5           | 0.217               | FEM   | 0.395                          |
|              | HWE satisfied | 15 | 1.36 | 1.04–1.78 | 0.023 | 69.3           | 0.000               | REM   | 0.891                          |
| TT vs. MM    | Overall       | 17 | 1.56 | 1.15–2.12 | 0.004 | 43.9           | 0.027               | FEM   | 0.759                          |
|              | China         | 12 | 1.66 | 1.05–2.12 | 0.029 | 54.8           | 0.011               | REM   | 0.272                          |
|              | Caucasian     | 4  | 1.45 | 1.01–2.08 | 0.042 | 0.0            | 0.425               | FEM   | 0.443                          |
|              | HWE satisfied | 15 | 1.46 | 1.05–2.03 | 0.026 | 43.8           | 0.036               | REM   | 0.746                          |
| TM vs. MM    | Overall       | 17 | 1.32 | 1.10–1.59 | 0.003 | 2.5            | 0.425               | FEM   | 0.037                          |
|              | China         | 12 | 1.07 | 0.79–1.46 | 0.650 | 0.0            | 0.755               | FEM   | 0.201                          |
|              | Caucasian     | 4  | 1.48 | 1.16–1.88 | 0.001 | 50.7           | 0.107               | FEM   | 0.334                          |
|              | HWE satisfied | 15 | 1.25 | 1.03–1.53 | 0.027 | 4.3            | 0.425               | FEM   | 0.055                          |

**Table 4** The results of meta-analysis of EL 584C/T polymorphism and CAD susceptibility

| Gene model   | Subgroup      | n  | OR   | 95% CI    | P     | I <sup>2</sup> | P for heterogeneity | Model | P for publication bias (Egger) |
|--------------|---------------|----|------|-----------|-------|----------------|---------------------|-------|--------------------------------|
| T vs. C      | Overall       | 13 | 0.83 | 0.73–0.95 | 0.006 | 69.5           | 0.000               | REM   | 0.011                          |
|              | Asian         | 6  | 0.84 | 0.66–1.07 | 0.151 | 74.5           | 0.001               | REM   | 0.462                          |
|              | Caucasian     | 7  | 0.83 | 0.70–0.98 | 0.029 | 68.9           | 0.004               | REM   | 0.000                          |
|              | HWE satisfied | 10 | 0.84 | 0.72–0.98 | 0.031 | 72.9           | 0                   | REM   | 0.064                          |
| TT+TC vs. CC | Overall       | 13 | 0.80 | 0.68–0.95 | 0.009 | 66.8           | 0.000               | REM   | 0.013                          |
|              | Asian         | 6  | 0.80 | 0.60–1.06 | 0.116 | 73.5           | 0.002               | REM   | 0.443                          |
|              | Caucasian     | 7  | 0.81 | 0.65–1.01 | 0.057 | 64.0           | 0.011               | REM   | 0.003                          |
|              | HWE satisfied | 10 | 0.82 | 0.68–0.99 | 0.036 | 70.1           | 0.000               | REM   | 0.072                          |
| TT vs. TC+CC | Overall       | 12 | 0.87 | 0.75–1.02 | 0.078 | 32.3           | 0.132               | FEM   | 0.100                          |
|              | Asian         | 5  | 0.92 | 0.68–1.23 | 0.563 | 43.8           | 0.130               | FEM   | 0.668                          |
|              | Caucasian     | 7  | 0.86 | 0.72–1.02 | 0.090 | 32.8           | 0.177               | FEM   | 0.009                          |
|              | HWE satisfied | 9  | 0.90 | 0.75–1.08 | 0.244 | 37.2           | 0.121               | FEM   | 0.173                          |
| TT vs. CC    | Overall       | 12 | 0.73 | 0.55–0.98 | 0.034 | 52.9           | 0.016               | REM   | 0.043                          |
|              | Asian         | 5  | 0.75 | 0.39–1.45 | 0.396 | 60.0           | 0.040               | REM   | 0.647                          |
|              | Caucasian     | 7  | 0.70 | 0.49–1.00 | 0.050 | 54.9           | 0.038               | REM   | 0.001                          |
|              | HWE satisfied | 9  | 0.74 | 0.53–1.05 | 0.092 | 56.9           | 0.017               | REM   | 0.141                          |
| TC vs. CC    | Overall       | 13 | 0.84 | 0.72–0.97 | 0.019 | 57.2           | 0.005               | REM   | 0.017                          |
|              | Asian         | 6  | 0.81 | 0.62–1.04 | 0.100 | 66.4           | 0.011               | REM   | 0.429                          |
|              | Caucasian     | 7  | 0.87 | 0.72–1.05 | 0.143 | 50.7           | 0.058               | REM   | 0.008                          |
|              | HWE satisfied | 10 | 0.85 | 0.71–1.00 | 0.055 | 57.2           | 0.005               | REM   | 0.083                          |

### Comparison of dominant gene inheritance models

The comparison of genotype TT+MT with genotype MM at M235T locus of the AGT gene showed that the heterogeneity between studies was not significant ( $I^2 = 17.3\%$ ,  $P > 0.05$ ). Therefore, the FEM was used for data merging. The results showed that OR = 1.51 (95% CI: 1.28–1.80), the difference was statistically significant. The same conclusion was obtained in the subgroup analysis of Chinese and Caucasian populations. After excluding the study that



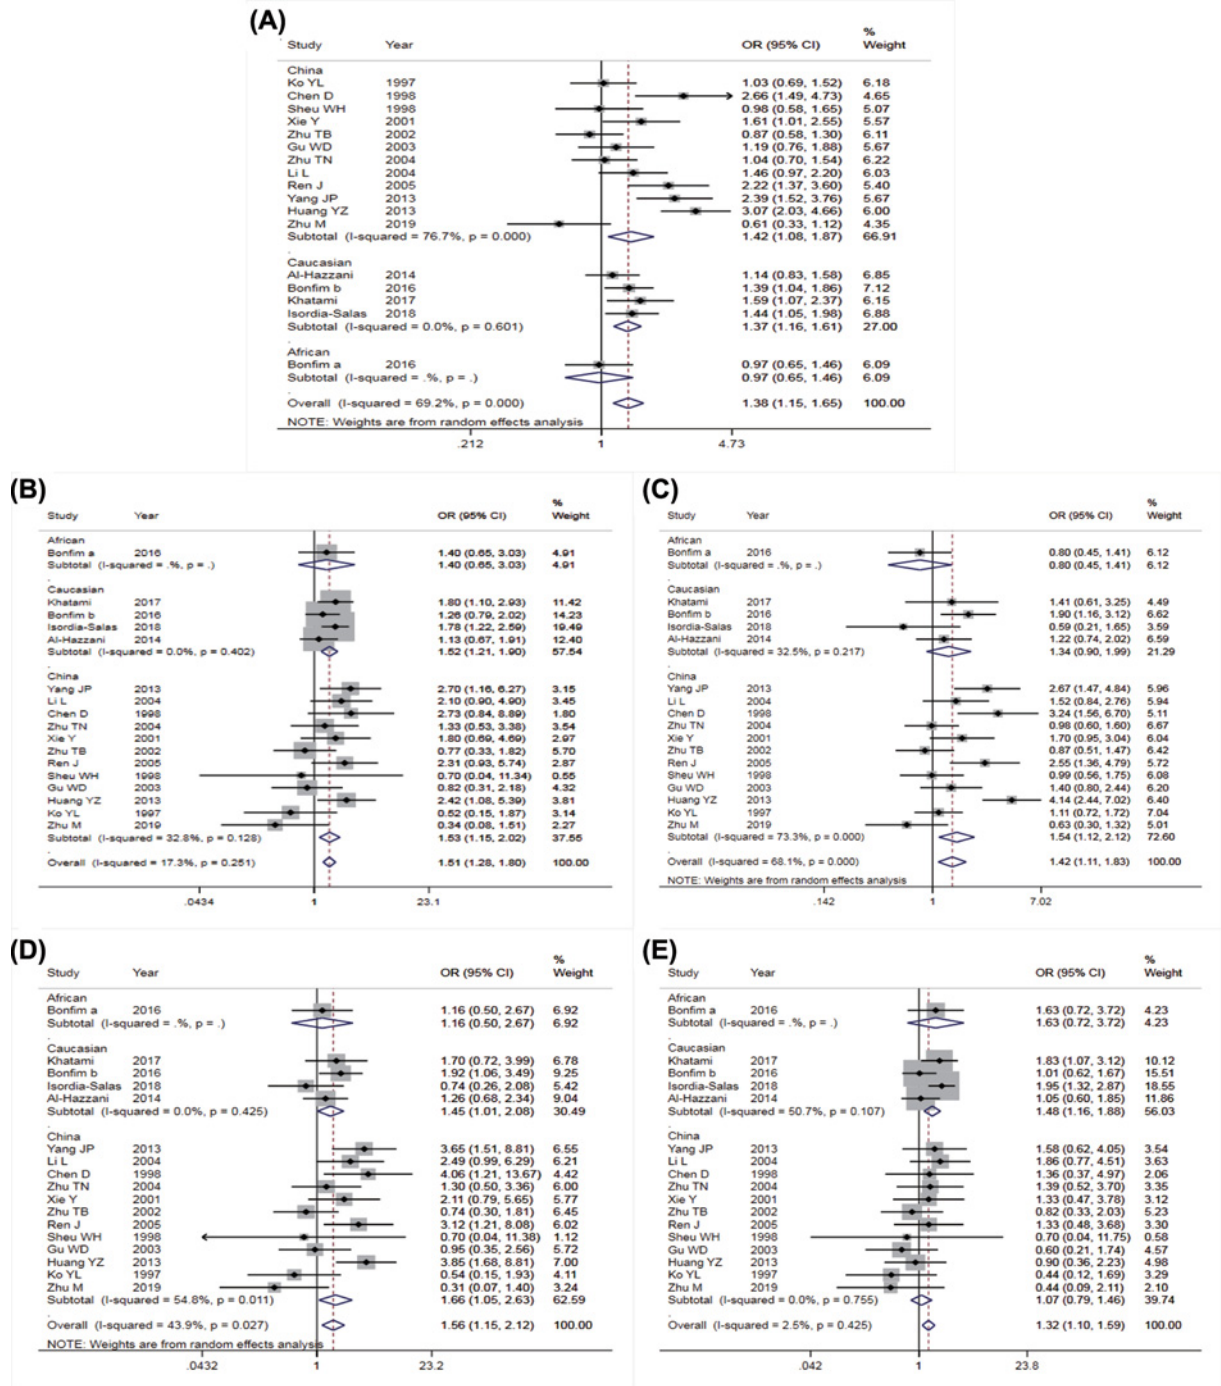

**Figure 2. Forest plots of Angiotensinogen M235T polymorphism and susceptibility to coronary artery disease**  
 Forest plots of AGT M235T polymorphism and CAD susceptibility (A) allele model; (B) dominant model; (C) recessive model; (D) homozygous model; (E) heterozygous model.

the control group did not meet HWE, the dominant gene model was also statistically significant. The funnel diagram was symmetrical (see in Figure 4B). Egger's test results indicated that there was no publication bias with  $P > 0.05$ .

The heterogeneity between the genotype TT+TC and genotype CC of EL 584C/T was significant ( $I^2 = 66.8\%$ ,  $P < 0.05$ ), so, the REM was used for data integration. The results showed that OR = 0.80 (95% CI: 0.68–0.95), the difference was statistically significant. Excluding the subgroup analysis of the control group that did not meet HWE,

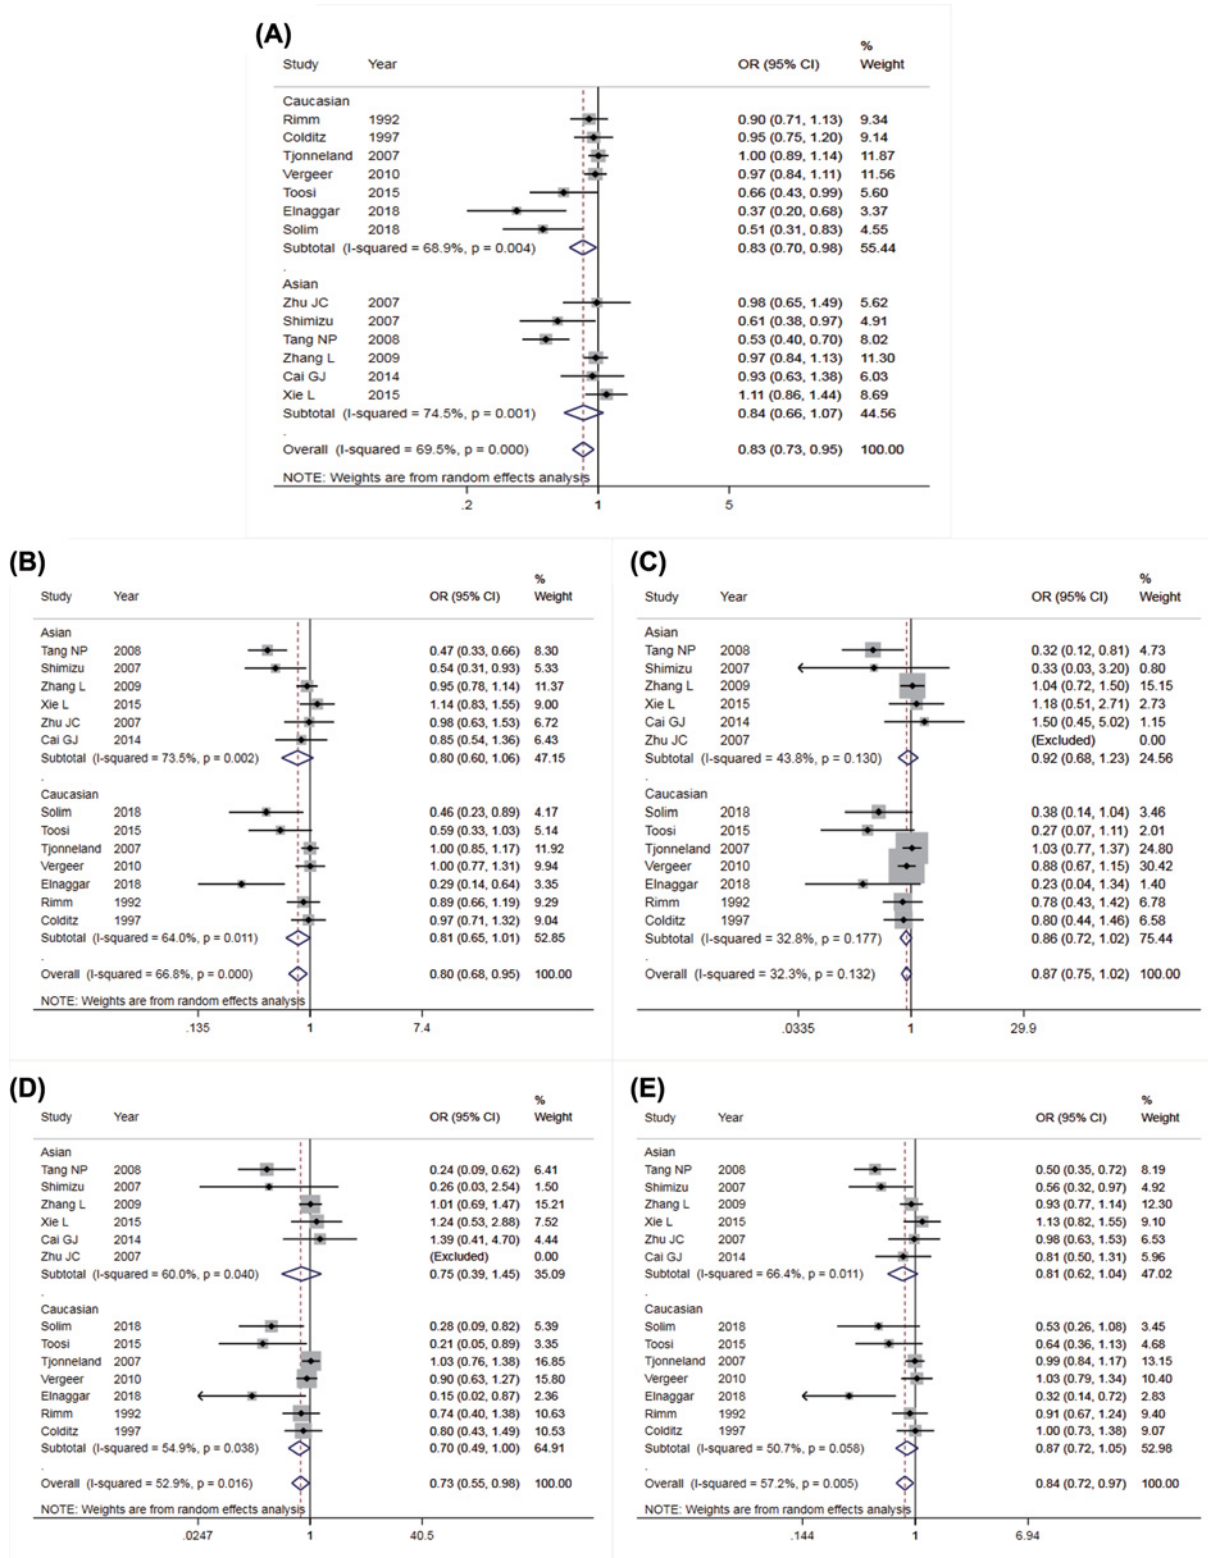

**Figure 3. Forest plots of Endothelial lipase 584C/T and susceptibility to coronary artery disease**  
 Forest plots of EL 584C/T polymorphism and CAD susceptibility (A) allele model; (B) dominant model; (C) recessive model; (D) homozygous model; (E) heterozygous model.

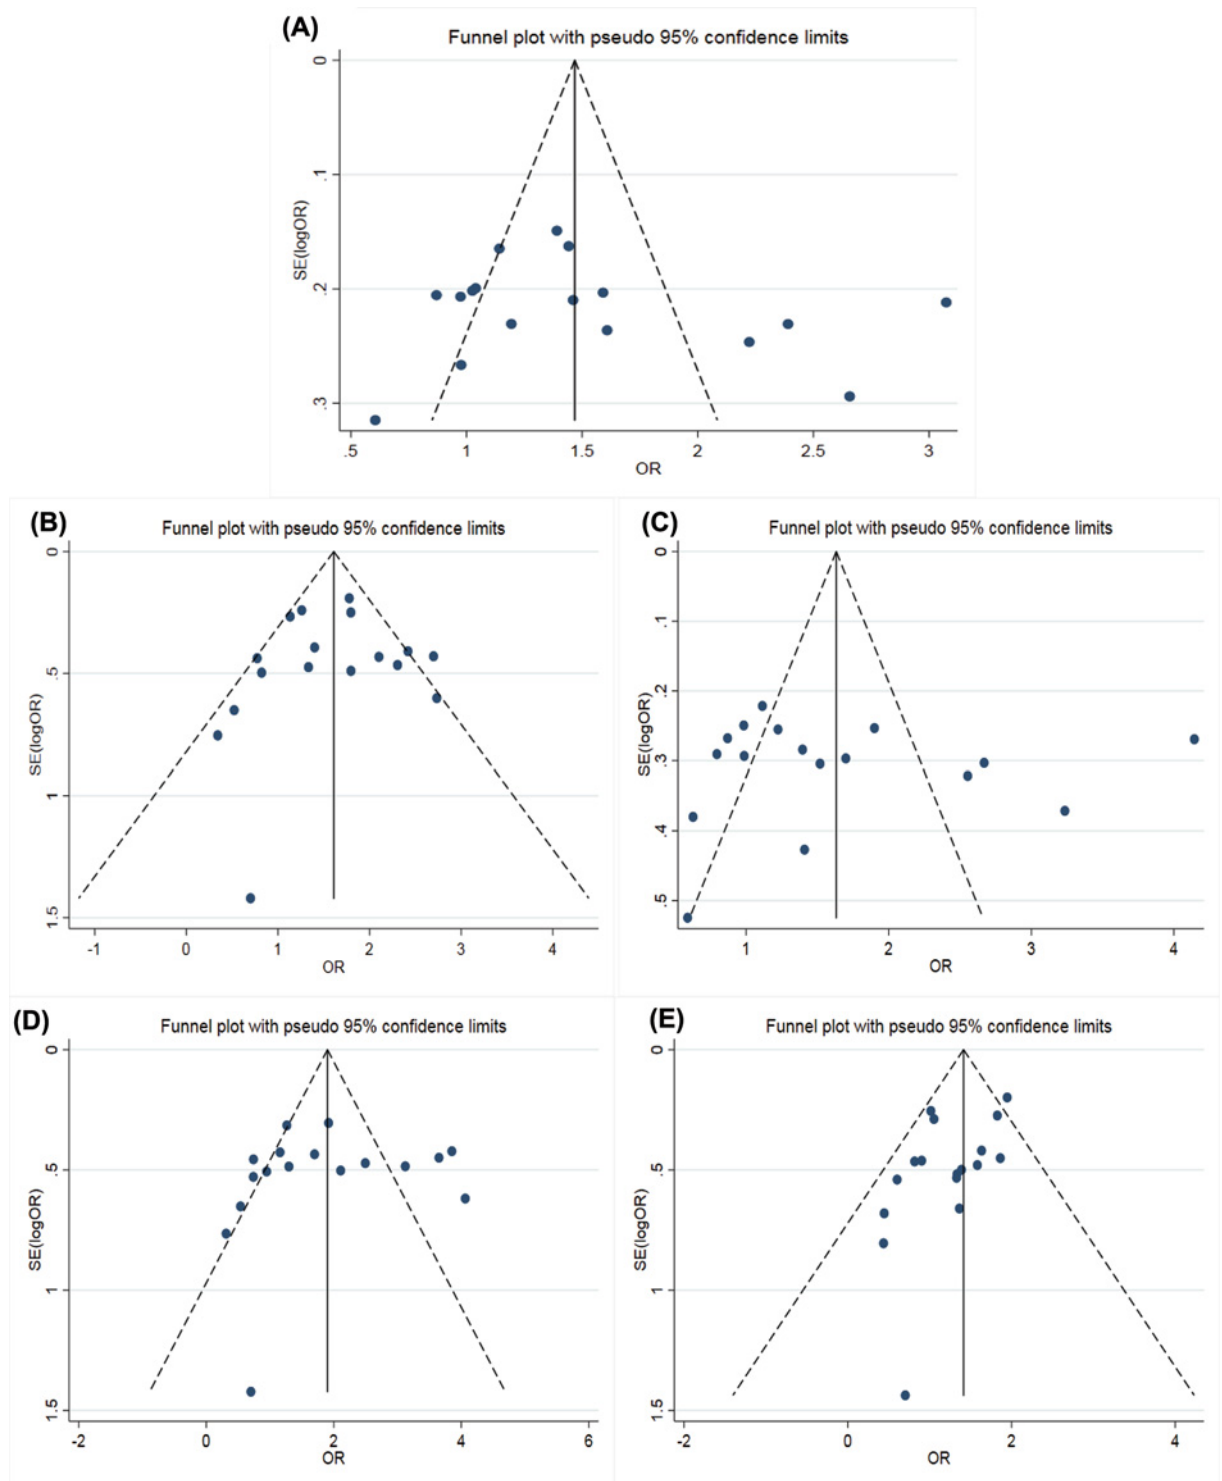

**Figure 4. Funnel plots of Angiotensinogen M235T polymorphism and susceptibility to coronary artery disease**  
Funnel plots of AGT M235T polymorphism and CAD susceptibility (A) allele model; (B) dominant model; (C) recessive model; (D) homozygous model; (E) heterozygous model.



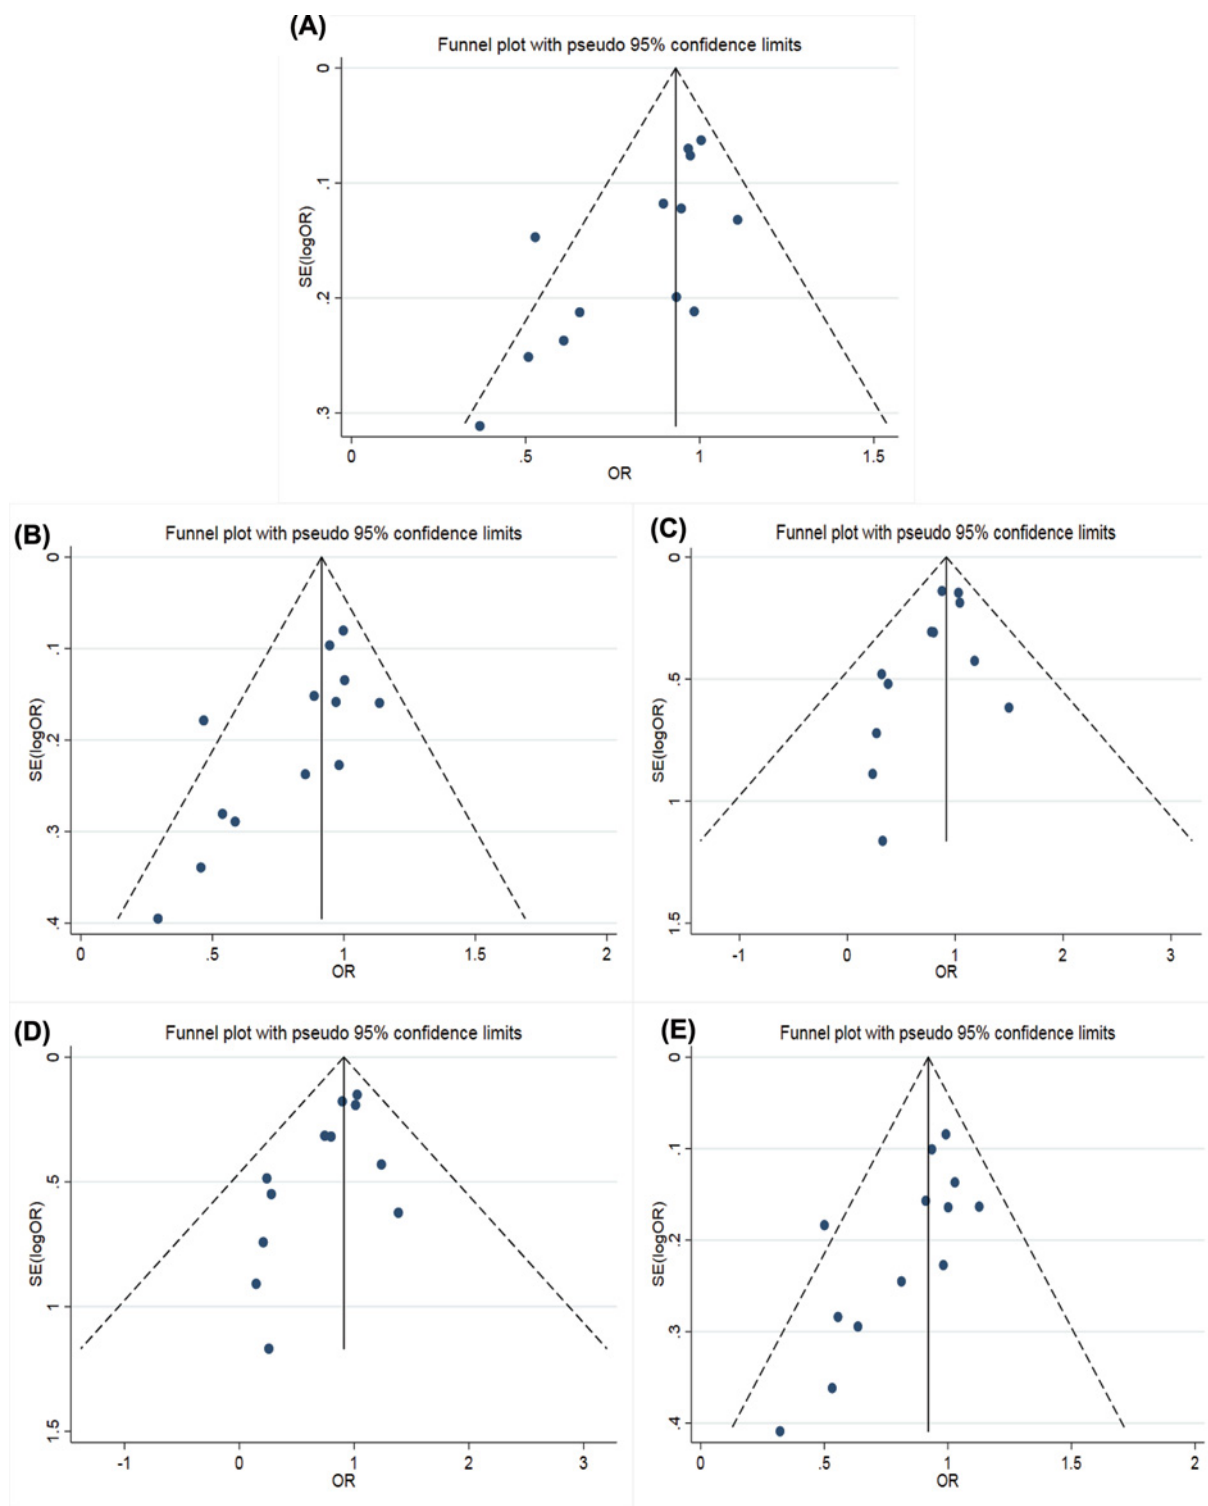

**Figure 5. Funnel plots of Endothelial lipase 584C/T and susceptibility to coronary artery disease**

Funnel plots of EL 584C/T polymorphism and CAD susceptibility (A) allele model; (B) dominant model; (C) recessive model; (D) homozygous model; (E) heterozygous model.

the difference was statistically significant. In the subgroup analysis of the Caucasian and Asian populations, the dominant gene model was not statistically significant. The symmetry of the funnel plot (Figure 5B) was general, *P*-value of Egger's test was less than 0.05, indicating that there was a particular publication bias.

### Comparison of recessive gene inheritance models

The comparison of genotype TT with genotype MT+MM at M235T locus of AGT gene showed that the heterogeneity between the studies was significant ( $I^2 = 68.1\%$ ,  $P < 0.05$ ), then, the REM was used to integrate data. The results indicated that OR = 1.42 (95% CI: 1.11–1.83), the difference was statistically significant. The same conclusion was reached in the subgroup analysis of Chinese and Caucasian populations. The recessive gene model was also statistically significant after removing the control groups that did not satisfy HWE. The funnel plot was symmetrical, shown in Figure 4C. Egger's test results suggested that there was no publication bias ( $P > 0.05$ ).

Compared genotype TT with genotype TC+CC at 584C/T locus of EL gene, there was no significant heterogeneity between studies ( $I^2 = 32.3\%$ ,  $P > 0.05$ ), and the FEM was used. The results showed that there was no significant difference with OR = 0.87 (95% CI: 0.75–1.02). Subgroup analysis that removed the control group that did not meet HWE showed no statistically significant difference. The recessive gene model was also not statistically significant in the Caucasian and Asian subgroups. The funnel plot (Figure 5C) was symmetrical. The *P*-value of Egger's test was higher than 0.05, indicating a low publication bias.

### Comparison of homozygous genetic models

The comparison between genotype TT and genotype MM at M235T locus of the AGT gene showed no significant heterogeneity between studies ( $I^2 = 43.9\%$ ,  $P > 0.05$ ). Therefore, the FEM was applied. The results showed that OR = 1.56 (95% CI: 1.15–2.12), the difference was statistically significant. The same conclusion was obtained from the subgroup analysis of Chinese and Caucasian populations. After excluding the study that the control group did not meet HWE, the homozygous genetic model was statistically significant. The funnel plot was symmetrical (see in Figure 4D). Egger's test results suggested that there was no publication bias ( $P > 0.05$ ).

Compared genotype CC with genotype TT at 584C/T locus of EL gene, there was significant heterogeneity ( $I^2 = 52.9\%$ ,  $P < 0.05$ ), then, the REM was applied. The results showed that OR = 0.073 (95% CI: 0.55–0.98), the difference was statistically significant. Subgroup analysis that removed the control group that did not meet HWE showed no statistically significant difference. In the subgroup analysis of Caucasian and Asian populations, the heterogeneity was not significantly decreased, and the homozygous gene model was not statistically significant. The symmetry of the funnel chart shown in Figure 5D was general, and the *P*-value of Egger's test was slightly less than 0.05, indicating partial publication bias.

### Comparison of heterozygous genetic models

The comparison of genotype TM at M235T locus of the AGT gene with genotype MM suggested that the heterogeneity was not significant ( $I^2 = 2.5\%$ ,  $P > 0.05$ ). Therefore, the FEM was used for data merging. The results showed that OR = 1.32 (95% CI: 1.10–1.59), the difference was statistically significant. The same conclusion was obtained in the Caucasian population subgroup after removal of the control group that did not satisfy HWE. While, the heterozygous genetic model had no statistical significance in the Chinese population. The symmetry of the funnel plot was general (see in Figure 4E). Egger's test results showed that  $P < 0.05$ , indicating that there was a partial publication bias.

Compared genotype CC with genotype TC at 584C/T locus of EL gene, significant heterogeneity was found ( $I^2 = 57.2\%$ ,  $P < 0.05$ ), then the REM was applied for data merging. The results showed that OR = 0.84 (95% CI: 0.72–0.97), the difference was statistically significant. Subgroup analysis that removed the control group that did not meet HWE showed no statistically significant difference. In the subgroup analysis of the Caucasian and Asian populations, the heterozygous gene model was also not statistically significant. The funnel plot shown in Figure 5E was generally symmetrical. Egger's test result indicated partial publication bias with *P*-value that was slightly less than 0.05.

### Sensitivity analysis

The result of susceptibility analysis between AGT M235T polymorphism and susceptibility to CAD is shown in Figure 6. It indicated that there was a statistically significant change in the heterozygous genetic model after elimination of one study. In contrast, no statistically significant change manifested in the allele model and other genetic models after removing the single literature, suggesting that the result was robust.

The sensitivity analysis result of EL 584C/T polymorphism and CAD susceptibility is shown in Figure 7. It showed that there was no statistically significant change in the allele model after a single study was eliminated, indicating that the result of the allele model was robust. The dominant gene model, recessive gene model, homozygous gene

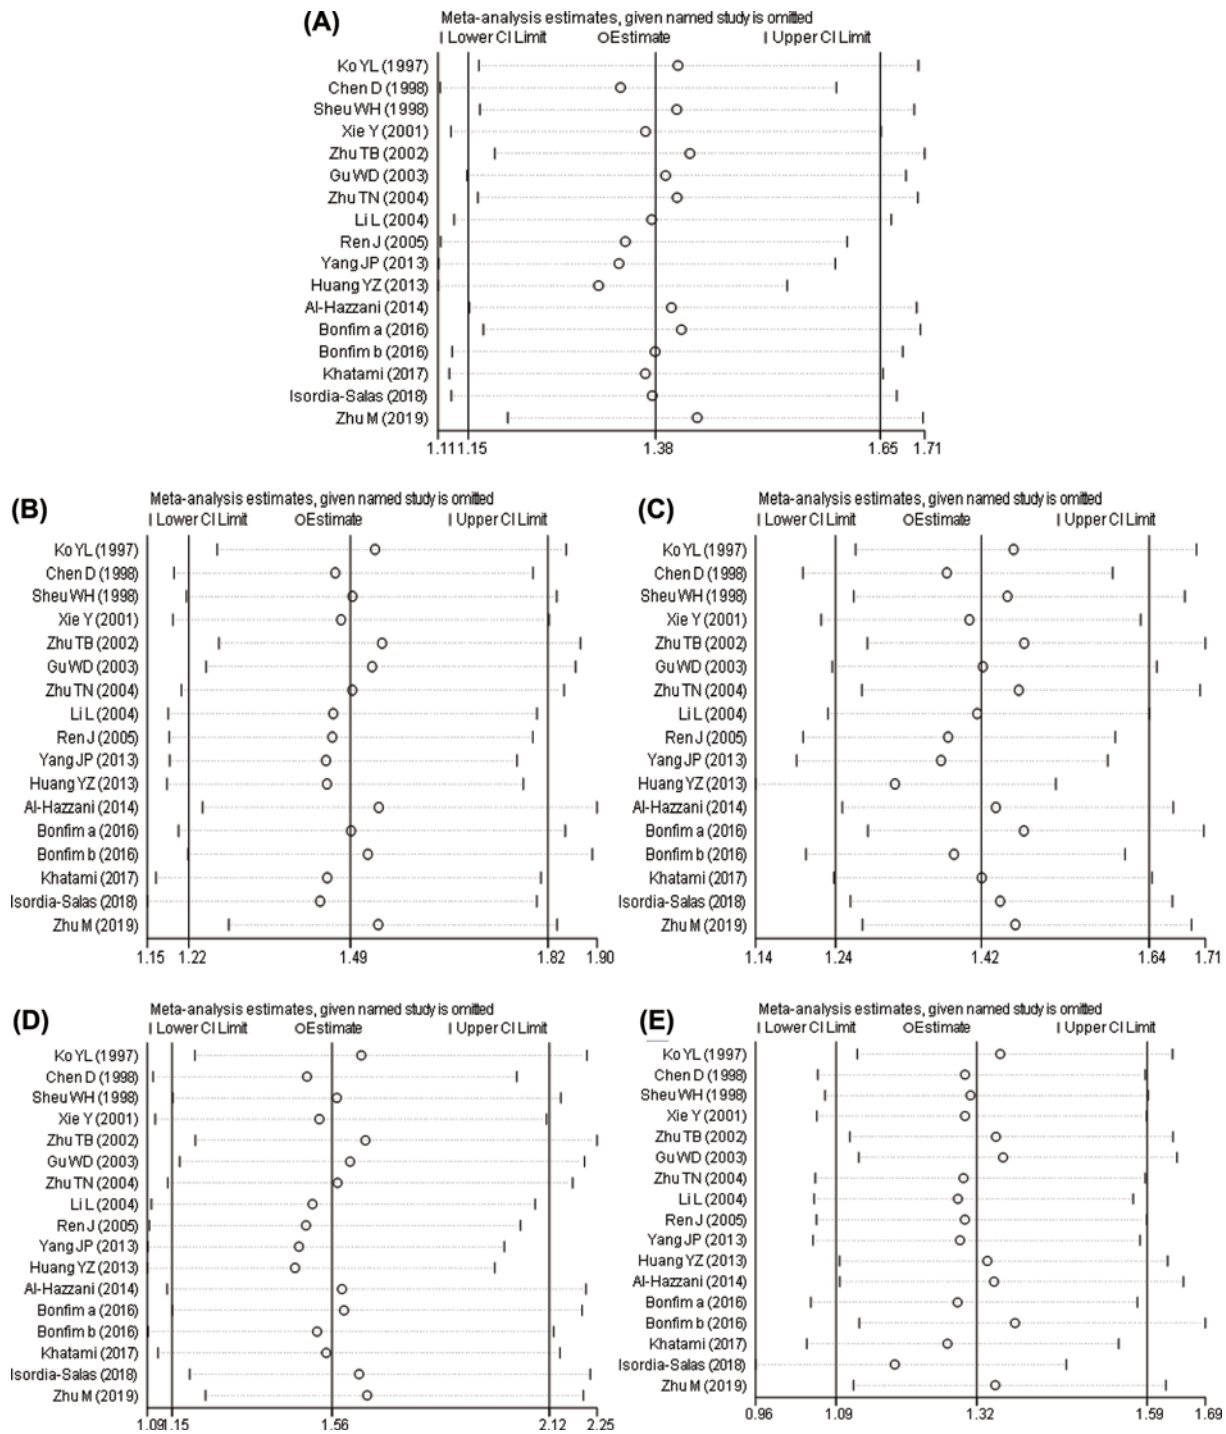

**Figure 6.** The results of sensitivity analysis between Angiotensinogen M235T polymorphism and susceptibility to coronary artery disease

The result of susceptibility analysis between AGT M235T polymorphism and susceptibility to CAD (A) allele model; (B) dominant model; (C) recessive model; (D) homozygous model; (E) heterozygous model.

Downloaded from <http://port.silverchair.com/biosciencearticle-pdf/40/7/BSR20201414/888900/bsr-2020-1414.pdf> by guest on 20 April 2024

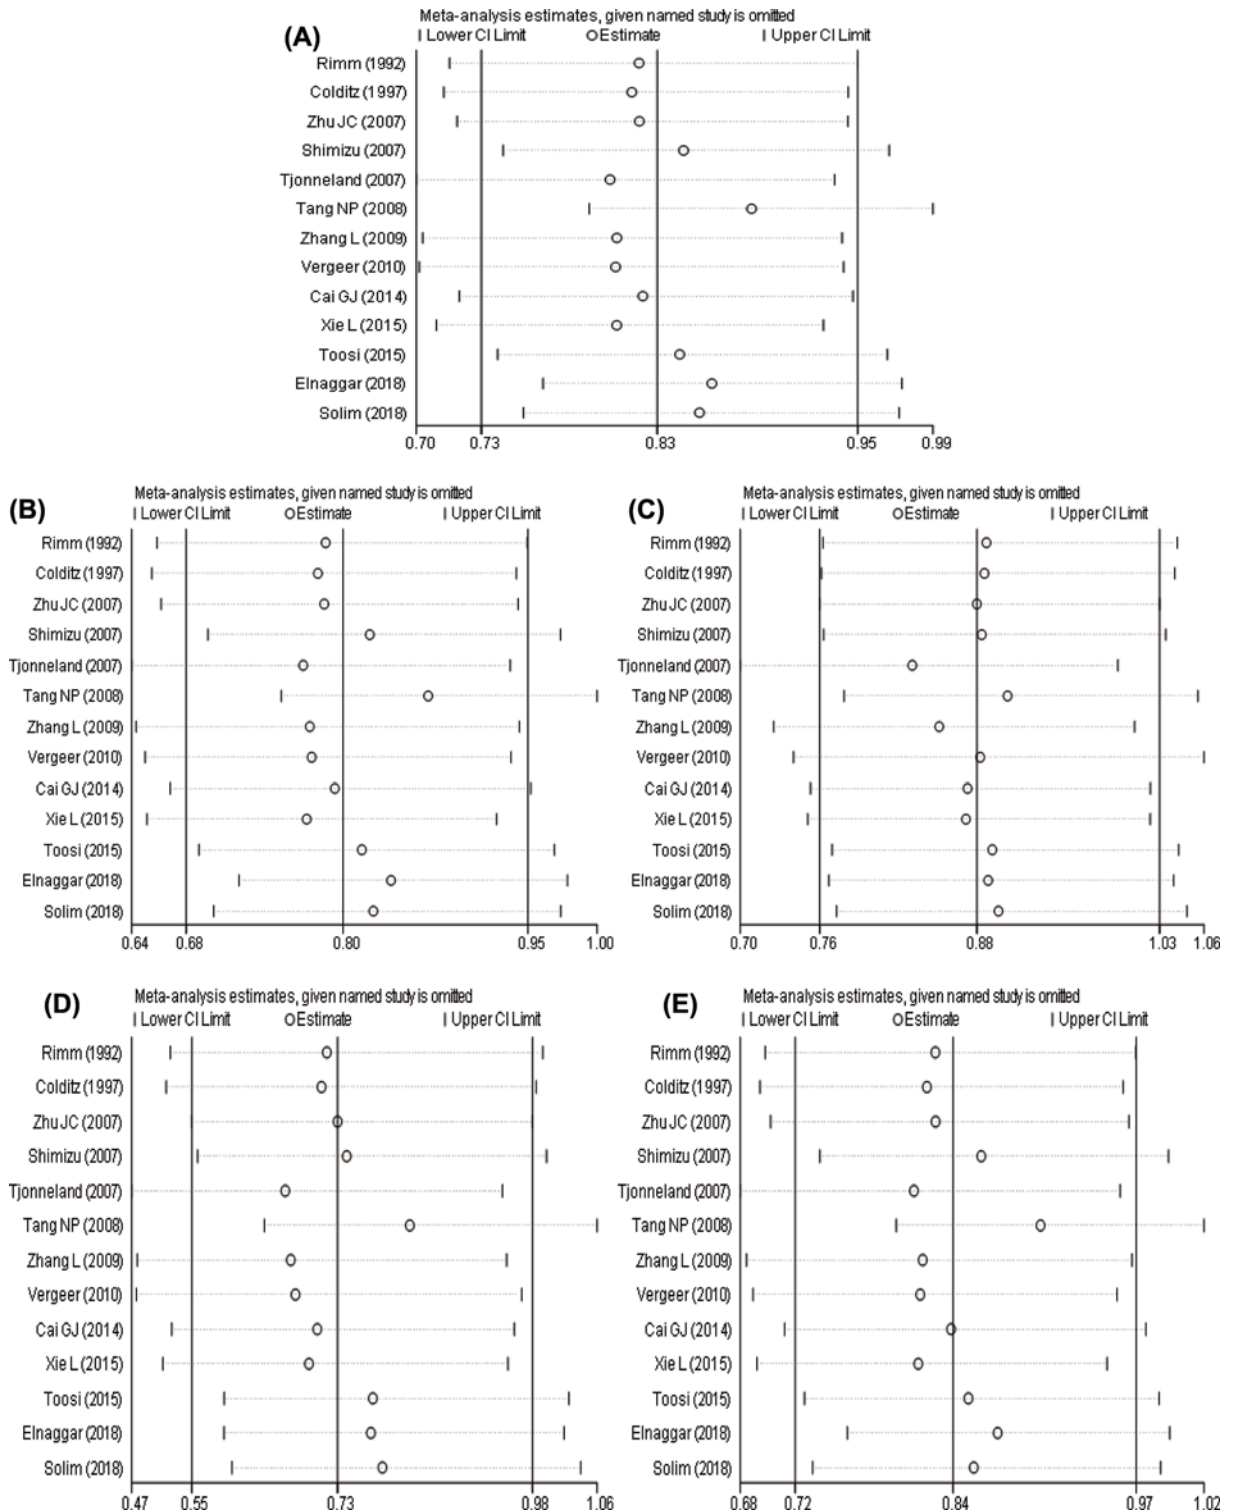

**Figure 7.** The results of sensitivity analysis between Endothelial lipase 584C/T polymorphism and susceptibility to coronary artery disease

The result of sensitivity analysis between EL 584C/T polymorphism and susceptibility to CAD (A) allele model; (B) dominant model; (C) recessive model; (D) homozygous model; (E) heterozygous model.

model and heterozygous gene model had one, one, four, one study, respectively, and they were excluded one by one; the differences were statistically significant.

## Discussion

The purpose of the present study was to explore the association between AGT M235T, EL 584C/T polymorphisms and CAD. In recent years, the polymorphism of AGT and EL genes have attracted considerable attention of researchers. It has been found that both AGT and EL genes have gene polymorphisms, which may affect gene transcription and expression, and are closely associated with the significant increase in coronary heart disease risks [44,45]. Also, AGT polymorphism may affect restenosis after stent implantation in patients with coronary heart disease [46]. Junusbekov et al. [47] suggests that AGT rs699 gene mutations are associated with cardiovascular phenotypes in atherosclerotic peripheral arterial obstructive disease. Moreover, AGT polymorphism was associated with cardiovascular risk in patients with acromegaly [48]. Studies have shown that serum concentration of full-length EL and carboxyl-terminal fragments could predict cardiovascular risk in patients with coronary heart disease [49]. Therefore, it is of considerable significance to study the polymorphism of AGT and EL genes and the susceptibility to CAD.

The results of AGT M235T polymorphism and CAD showed that the differences were statistically significant in the dominant, recessive, homozygous, heterozygous, and allelic gene models. Allele T could be a risk factor for CAD. After removing two studies, in which the control group did not satisfy HWE, the results of meta-analysis were consistent with those before exclusion. The ethnicity subgroup analysis results suggested that except the heterozygous genetic model of the Chinese population, it was statistically significant in other genetic models of the Chinese population and all genetic models of the Caucasian population. Also, the funnel plot of publication bias was symmetrical, and the *P*-value of Egger's test was greater than 0.05, suggesting that there was no publication bias and the correlation between AGT M235T polymorphism and CAD susceptibility was robust, which was also verified by sensitivity analysis results. In a meta-analysis involving nine studies, Wang et al. [50] indicated that the genotype TT of AGT M235T might increase the risk of CAD, which is consistent with the results of this study. We have included more recent studies to demonstrate such a correlation.

The results of EL 584C/T polymorphism and CAD showed that the differences were statistically significant in dominant, homozygous, heterozygous, and allelic gene models, and the recessive genetic model had no statistical significance. Allele model and dominant gene model were still statistically significant after the control groups not meeting HWE were removed, which indicated that the two models were robust. While, in the results of the ethnicity subgroup analysis, there was no statistical significance in dominant, recessive, homozygous, and heterozygous genetic models of Asian and Caucasian populations. Also, the heterogeneity did not decrease significantly, suggesting that ethnicity may not be the primary source of heterogeneity. The results of publication bias showed that the symmetry of funnel plots in many genetic models were general, and the *P*-values of Egger's test were all slightly less than 0.05, indicating the robustness deviation of the conclusion. Also, there may be a potential publication bias having a significant impact on the outcome. It can also be seen from the results of sensitivity analysis that, except the allele genetic model, the differences in other genetic models were statistically significant after excluding some of the literatures, which indicated that the conclusion of 584C/T polymorphism of the EL gene and susceptibility to CAD should be taken seriously. A meta-analysis of EL 584C/T polymorphism and coronary heart disease susceptibility by Cai et al. [51] suggested that there were significant differences between allele model and homozygote model in the Asian population. At the same time, there were no statistical differences in allele model of the Caucasian population, which is not consistent with the conclusion of this study, as more high-quality researches are included in the present study.

Furthermore, the present study also had some limitations: (1) there was heterogeneity in allele model, recessive gene model and homozygous model of AGT M235T gene, and the heterogeneity did not decrease significantly according to ethnic subgroup analysis, (2) the heterogeneity of the EL 584C/T gene was significant in all genetic models except the recessive gene model, and there was no significant decrease in the heterogeneity after analysis by ethnic subgroup, (3) except recessive gene model, EL 584C/T gene had publication bias in other genetic models, especially in Caucasian population, (4) the interactions between gene and gene, gene and environment were not analyzed.

In conclusion, AGT M235T and EL 584C/T genes are associated with CAD susceptibility. Allele T, genotype TT and TC of AGT M235T gene and allele C, genotype CC of EL 584C/T gene could increase the risk of CAD. In particular, the relationship between the AGT M235T gene and CAD is robust, while the relationship between the EL 584C/T gene and CAD susceptibility is unstable. Furthermore, considering the limitations of the present study, further studies are required on a larger scale to explore the relationship between AGT and EL polymorphisms, and CAD susceptibility.



## Competing Interests

The authors declare that there are no competing interests associated with the manuscript.

## Funding

This work was supported by the National Natural Science Foundation of China [grant number 81660049].

## Author Contribution

Hongyan Zhao, Jidong Rong: critical revision of the manuscript. Hongyan Zhao, Ranzun Zhao, Jidong Rong: substantial contribution to the conception and design of the work, manuscript drafting. Hongyan Zhao, Shan Hu: acquisition, analysis, and interpretation of the data. Hongyan Zhao, Ranzun Zhao: revising the manuscript critically, final approval of the version to be published.

## Abbreviations

AGT, angiotensinogen; CAD, coronary artery disease; EL, endothelial lipase; FEM, fixed-effects model; HDL-C, high-density lipoprotein cholesterol; HWE, Hardy–Weinberg equilibrium; NOS, Newcastle–Ottawa Scale; OR, odds ratio; REM, random-effects model.

## References

- Qu, Y., Zhang, F., Yang, J., Dai, Y., Li, C., Yang, H. et al. (2019) Clinical characteristics and outcomes in asian patients with premature coronary artery disease: insight from the FOCUS Registry. *Angiology* **70**, 554–560, <https://doi.org/10.1177/0003319718810182>
- Bauters, C., Tricot, O., Meurice, T. and Lamblin, N. (2017) Long-term risk and predictors of cardiovascular death in stable coronary artery disease: the CORONOR study. *Coron. Artery Dis.* **28**, 636–641, <https://doi.org/10.1097/MCA.0000000000000560>
- Park, H.W., Kim, K.H., Song, I.G., Kwon, T.G., Kim, W.H. and Bae, J.H. (2017) Body mass index, carotid plaque, and clinical outcomes in patients with coronary artery disease. *Coron. Artery Dis.* **28**, 278–286, <https://doi.org/10.1097/MCA.0000000000000467>
- Shigemoto, E., Iwata, A., Futami, M., Kato, Y., Yamashita, M., Imaizumi, S. et al. (2019) Influence of chronic kidney disease on coronary plaque components in coronary artery disease patients with both diabetes mellitus and hypertension. *Heart Vessels* **34**, 1065–1075, <https://doi.org/10.1007/s00380-018-01334-5>
- Choi, Y., Lim, S., Lee, K.Y., Park, H.W., Byeon, J., Hwang, B.H. et al. (2018) Renin-angiotensin system blockade reduces cardiovascular events in nonheart failure, stable patients with prior coronary intervention. *Coron. Artery Dis.* **29**, 451–458, <https://doi.org/10.1097/MCA.0000000000000609>
- Lanz, J.R., Pereira, A.C., Lemos, P.A., Martinez, E. and Krieger, J.E. (2005) Angiotensinogen M235T polymorphism is associated with coronary artery disease severity. *Clin. Chim. Acta* **362**, 176–181, <https://doi.org/10.1016/j.cccn.2005.06.004>
- van der Net, J.B., Isaacs, A., Dallinga-Thie, G.M., Kastelein, J.J., Defesche, J.C., Steyerberg, E.W. et al. (2008) Haplotype of the angiotensinogen gene is associated with coronary heart disease in familial hypercholesterolemia. *J. Hypertens.* **26**, 462–467, <https://doi.org/10.1097/HJH.0b013e3282f2d33c>
- Al-Jafari, A.A., Daoud, M.S. and Ataya, F.S. (2017) Renin-angiotensin system gene polymorphisms and coronary artery disease in Saudi patients with diabetes mellitus. *Int. J. Clin. Exp. Pathol.* **10**, 10505–10514
- Khatami, M., Heidari, M.M., Hadadzadeh, M., Scheiber-Mojdehkar, B. and Houshmand, M. (2017) Simultaneous genotyping of the rs4762 and rs699 polymorphisms in angiotensinogen gene and correlation with Iranian CAD patients with novel hexa-primer ARMS-PCR. *Iran J. Public Health* **46**, 811–819
- Zhu, M., Lin, J., Wang, C., Yang, M., Lv, H., Yang, M. et al. (2019) The relationship among angiotensinogen genes polymorphisms and hs-CRP and coronary artery disease. *J. Clin. Lab. Anal.* **33**, e22881, <https://doi.org/10.1002/jcla.22881>
- Avcı, E., Kiris, T., Demirtas, A.O. and Kadi, H. (2018) Relationship between high-density lipoprotein cholesterol and the red cell distribution width in patients with coronary artery disease. *Lipids Health Dis.* **17**, 53, <https://doi.org/10.1186/s12944-018-0709-5>
- Cai, G., Zhang, B., Ma, C., Shi, G., Weng, W. and Xue, S. (2016) Associations of Rs3744841 and Rs3744843 polymorphisms in endothelial lipase gene with risk of coronary artery disease and lipid levels in a Chinese population. *PLoS ONE* **11**, e162727, <https://doi.org/10.1371/journal.pone.0162727>
- Sun, L., Ishida, T., Miyashita, K., Kinoshita, N., Mori, K., Yasuda, T. et al. (2014) Plasma activity of endothelial lipase impacts high-density lipoprotein metabolism and coronary risk factors in humans. *J. Atheroscler. Thromb.* **21**, 313–321, <https://doi.org/10.5551/jat.20131>
- Solim, L.A., Gencan, I.A. et al. (2018) Endothelial lipase gene polymorphism (584 C/T) in coronary artery patients among a Turkish population. *In Vivo* **32**, 1105–1109
- Xie, L., Sun, Y., Tong, Y., Liu, Y. and Deng, Y. (2015) Association of endothelial lipase gene-384A/C with coronary artery disease in Han Chinese people. *BMJ Open* **5**, e7621, <https://doi.org/10.1136/bmjopen-2015-007621>
- Stang, A. (2010) Critical evaluation of the Newcastle-Ottawa scale for the assessment of the quality of nonrandomized studies in meta-analyses. *Eur. J. Epidemiol.* **25**, 603–605, <https://doi.org/10.1007/s10654-010-9491-z>
- Ko, Y.L., Wang, S.M., Ko, Y.S., Chu, P., Teng, M., Cheng, N. et al. (1997) Angiotensinogen and angiotensin-I converting enzyme gene polymorphisms and the risk of coronary artery disease in Chinese. *Hum. Genet.* **100**, 210–214, <https://doi.org/10.1007/s004390050492>
- Chen, D., Mei, Z., Fan, W., Shi, H., Yong, L., Qin, C. et al. (1998) A molecular variant of angiotensinogen gene is associated with myocardial infarction in chinese. *Chin. J. Med. Genet.* **15**, 133–135
- Sheu, W.H., Lee, W.J., Jeng, C.Y. et al. (1998) Angiotensinogen gene polymorphism is associated with insulin resistance in nondiabetic men with or without coronary heart disease. *Am. Heart J.* **136**, 125–131, [https://doi.org/10.1016/S0002-8703\(98\)70192-9](https://doi.org/10.1016/S0002-8703(98)70192-9)

- 20 Xie, Y., Zhang, F.M., Ma, W.Z., Yang, D., Jia, Y.P. et al. (2001) Association between gene polymorphism of renin-angiotensin system and coronary heart disease. *Acta Univ. Medicin. Nanjing* **021**, 488–491
- 21 Zhu, T.B., Xu, W., Yang, Z.J. et al. (2003) Association analysis of three polymorphism of renin-angiotensin system genes with coronary heart disease. *Jiangsu Med. J.* **28**, 745–746
- 22 Weidong, G.U., Zhu, J. and Pan, M. (2003) Effects of angiotensinogen and apolipoprotein E gene polymorphisms on coronary heart disease. *J. Nantong Med.* **23**, 394–395
- 23 Zhu, T.N., Pan, J.Q., Shen, Z.J. et al. (2004) Gene polymorphisms of renin-angiotensin system and coronary thrombosis disease. *Zhongguo Shi Yan Xue Za Zhi* **12**, 674–679
- 24 Li, L., Fan, X.H., Zhang, Y.W. et al. (2004) Association between angiotensinogen gene polymorphism and severity of coronary artery stenosis. *J. Med. Forum* **25**, 12–14
- 25 Ren, J., Jia, Y.P., Lv, J.Y. and Guo, X.H. (2005) Relationship between angiotensinogen gene M235T polymorphism and coronary heart disease. *J. Shanxi Med. Univ.* **36**, 439–442
- 26 Yang, J.P., Fang, W.W., Jiang, Y.P. and Sun, J.J. (2013) Relationship between coronary heart disease and polymorphism of angiotensin converting enzyme and angiotensinogen genes. *Chinese J. Cardiovasc. Res.* **11**, 600–604
- 27 Al-Hazzani, A., Daoud, M.S., Ataya, F.S., Fouad, D. and Al-Jafari, A.A. (2014) Renin-angiotensin system gene polymorphisms among Saudi patients with coronary artery disease. *J. Biol. Res.* **21**, 8, <https://doi.org/10.1186/2241-5793-21-8>
- 28 Bonfim-Silva, R., Guimaraes, L.O., Santos, J.S., Pereira, J.F., Leal Barbosa, A.A. and Souza Rios, D.L. (2016) Case-control association study of polymorphisms in the angiotensinogen and angiotensin-converting enzyme genes and coronary artery disease and systemic artery hypertension in African-Brazilians and Caucasian-Brazilians. *J. Genet.* **95**, 63–69, <https://doi.org/10.1007/s12041-015-0599-5>
- 29 Isordia-Salas, I., Alvarado-Moreno, J.A., Jimenez-Alvarado, R.M. et al. (2018) Association of renin-angiotensin system genes polymorphisms and risk of premature ST elevation myocardial infarction in young Mexican population. *Blood Coagul. Fibrinolysis* **29**, 1–8
- 30 Zhu, M., Lin, J., Wang, C. et al. (2019) The relationship among angiotensinogen genes polymorphisms and hs-CRP and coronary artery disease. *J. Clin. Lab. Anal.* **33**, 1–7
- 31 Huang, Y.Z., Zhu, Y.G., Wang, F.J. and Xiang, Y.D. (2013) Association between the gene polymorphism of angiotensinogen and angiotensin converting enzyme and coronary artery disease. *Lab. Med. Clin.* **10**, 816–818
- 32 Rimm, E.B., Giovannucci, E.L., Stampfer, M.J., Colditz, G.A., Litin, L.B. and Willett, W.C. (1992) Reproducibility and validity of an expanded self-administered semiquantitative food frequency questionnaire among male health professionals. *Am. J. Epidemiol.* **10**, 1114–1126
- 33 Colditz, G.A., Manson, J.E. and Hankinson, S.E. (1997) The Nurses Health Study: 20-year contribution to the understanding of health among women. *J. Womens Health* **6**, 49–62
- 34 Shimizu, M., Kanazawa, K., Hirata, K., Ishida, T., Hiraoka, E., Matsuda, Y. et al. (2007) Endothelial lipase gene polymorphism is associated with acute myocardial infarction, independently of high-density lipoprotein-cholesterol levels. *Circulation* **71**, 842–846, <https://doi.org/10.1253/circj.71.842>
- 35 Tj Nneland, A., Olsen, A., Boll, K., Stripp, C., Christensen, J., Engholm, G. et al. (2007) Study design, exposure variables, and socioeconomic determinants of participation in Diet, Cancer and Health: a population-based prospective cohort study of 57,053 men and women in Denmark. *Scand. J. Public Health* **35**, 432–441, <https://doi.org/10.1080/14034940601047986>
- 36 Zhu, J.C., Jin, G.D., Jin, Z.Y. and Xu, G. (2007) Association of endothelial lipase gene Thr111Ile and Gly26Ser polymorphism with lipoprotein in patients with coronary heart disease. *Chin. J. Pathophysiol.* **23**, 1684–1687
- 37 Tang, N.P., Wang, L.S., Yang, L., Zhou, B., Gu, H.J., Sun, Q.M. et al. (2007) Protective effect of an endothelial lipase gene variant on coronary artery disease in a Chinese population. *J. Lipid Res.* **49**, 369–375, <https://doi.org/10.1194/jlr.M700399-JLR200>
- 38 Zhang, L. (2007) Study on the relationship between endothelial lipase single gene polymorphism and coronary heart disease. *Peking Union Med. Coll.* **1**–74
- 39 Vergeer, M., Cohn, D.M., Boekholdt, S.M., Sandhu, M.S., Prins, H.M., Ricketts, S.L. et al. (2010) Lack of association between common genetic variation in endothelial lipase (LIPG) and the risk for CAD and DVT. *Atherosclerosis* **211**, 558–564, <https://doi.org/10.1016/j.atherosclerosis.2010.04.004>
- 40 Cai, G.J., He, G.P., Huang, Z.Y. and Qi, C.P. (2014) Lack of association between a common polymorphism of the endothelial lipase gene and early-onset coronary artery disease in a Chinese Han population. *Genet. Mol. Res.* **13**, 1059–1069, <https://doi.org/10.4238/2014.February.20.7>
- 41 Toosi, S., Senemar, S., Ahmadi, Z. and Radmanesh, S. (2015) Investigation of the association between 584C/T polymorphism of EL gene and risk of premature coronary artery disease in Fars Province. *J. Cardiovasc. Thorac. Res.* **7**, 118–121, <https://doi.org/10.15171/jcvtr.2015.25>
- 42 Xie, L., Sun, Y., Tong, Y. et al. (2015) Association of endothelial lipase gene-384A/C with coronary artery disease in Han Chinese people. *BMJ Open* **5**, e7621, <https://doi.org/10.1136/bmjopen-2015-007621>
- 43 Elnaggar, I.Z., Hussein, S., Amin, M.I. and Abdelaziz, E.A. (2019) Association of 584C/T polymorphism in endothelial lipase gene with risk of coronary artery disease. *J. Cell. Biochem.* **1**–7
- 44 Wang, W.Z. (2013) Association between T174M polymorphism in the angiotensinogen gene and risk of coronary artery disease: a meta-analysis. *J. Geriatric Cardiol.* **10**, 59–65
- 45 Cai, G., Zhang, B., Ma, C., Shi, G., Weng, W. and Xue, S. (2016) Associations of Rs3744841 and Rs3744843 polymorphisms in endothelial lipase gene with risk of coronary artery disease and lipid levels in a Chinese population. *PLoS ONE* **11**, e162727, <https://doi.org/10.1371/journal.pone.0162727>
- 46 Zhu, M., Yang, M., Lin, J., Zhu, H., Lu, Y. et al. (2017) Association of seven renin-angiotensin system gene polymorphisms with restenosis in patients following coronary stenting. *J. Renin Angiotensin Aldosterone Syst.* **18**, 1607554682, <https://doi.org/10.1177/1470320316688774>
- 47 Junusbekov, Y., Bayoglu, B., Cengiz, M., Dirican, A. and Arslan, C. (2019) AGT rs699 and AGTR1 rs5186 gene variants are associated with cardiovascular-related phenotypes in atherosclerotic peripheral arterial obstructive disease. *Irish J. Med. Sci.* **189**, <https://doi.org/10.1007/s11845-019-02166-6>

- 48 Erbas, T., Cinar, N., Dagdelen, S., Gedik, A., Yorgun, H., Canpolat, U. et al. (2017) Association between ACE and AGT polymorphism and cardiovascular risk in acromegalic patients. *Pituitary* **20**, 569–577, <https://doi.org/10.1007/s11102-017-0819-5>
- 49 Nagao, M., Miyashita, K., Mori, K., Irino, Y., Toh, R., Hara, T. et al. (2019) Serum concentration of full-length- and carboxy-terminal fragments of endothelial lipase predicts future cardiovascular risks in patients with coronary artery disease. *J. Clin. Lipidol.* **13**, 839–846, <https://doi.org/10.1016/j.jacl.2019.07.007>
- 50 Wang, Y.J. and Pan, Y. (2012) Angiotensinogen gene M235T polymorphism and risk of coronary artery disease: a meta-analysis. *Mol. Med. Rep.* **6**, 884–888, <https://doi.org/10.3892/mmr.2012.1011>
- 51 Cai, G., Huang, Z., Zhang, B., Weng, W. and Shi, G. (2014) The associations between endothelial lipase 584C/T polymorphism and HDL-C level and coronary t heart disease susceptibility: a meta-analysis. *Lipids Health Dis.* **13**, 85, <https://doi.org/10.1186/1476-511X-13-85>
